## CORRECTION

# Correction: Novel insights into serodiagnosis and epidemiology of *Erysipelothrix rhusiopathiae*, a newly recognized pathogen in muskoxen (*Ovibos moschatus*)

Fabien Mavrot, Karin Orsel, Wendy Hutchins, Layne G. Adams, Kimberlee Beckmen, John E. Blake, Sylvia L. Checkley, Tracy Davison, Juliette Di Francesco, Brett Elkin, Lisa-Marie Leclerc, Angela Schneider, Matilde Tomaselli, Susan J. Kutz

There are errors in the author affiliations. The correct affiliations are as follows:

Fabien Mavrot<sup>1</sup>, Karin Orsel<sup>1</sup>, Wendy Hutchins<sup>2</sup>, Layne G. Adams<sup>3</sup>, Kimberlee Beckmen<sup>4</sup>, John E. Blake<sup>5</sup>, Sylvia L. Checkley<sup>1</sup>, Tracy Davison<sup>6</sup>, Juliette Di Francesco<sup>1</sup>, Brett Elkin<sup>6</sup>, Lisa-Marie Leclerc<sup>7</sup>, Angela Schneider<sup>1</sup>, Matilde Tomaselli<sup>1,8</sup>, Susan J. Kutz<sup>1</sup>

**1** Faculty of Veterinary Medicine, University of Calgary, Calgary, Alberta, Canada **2** Cumming School of Medicine, University of Calgary, Calgary, Alberta, Canada **3** US Geological Survey, Alaska Science Center, Anchorage, Alaska, USA **4** Alaska Department of Fish and Game, Fairbanks, Alaska, USA **5** University of Fairbanks, Fairbanks, Alaska, USA **6** Government of the Northwest Territories, Yellowknife, Northwest Territories, Canada **7** Government of Nunavut, Kugluktuk, Nunavut, Canada **8** Canadian High Arctic Research Station, Polar Knowledge Canada, Cambridge Bay, Nunavut, Canada

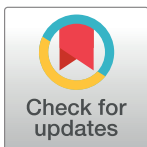

## Reference

1. Mavrot F, Orsel K, Hutchins W, Adams LG, Beckmen K, Blake JE, et al. (2020) Novel insights into serodiagnosis and epidemiology of *Erysipelothrix rhusiopathiae*, a newly recognized pathogen in muskoxen (*Ovibos moschatus*). PLoS ONE 15(4): e0231724. <https://doi.org/10.1371/journal.pone.0231724> PMID: 32315366

## OPEN ACCESS

**Citation:** Mavrot F, Orsel K, Hutchins W, Adams LG, Beckmen K, Blake JE, et al. (2020) Correction: Novel insights into serodiagnosis and epidemiology of *Erysipelothrix rhusiopathiae*, a newly recognized pathogen in muskoxen (*Ovibos moschatus*). PLoS ONE 15(10): e0240760. <https://doi.org/10.1371/journal.pone.0240760>

**Published:** October 8, 2020

**Copyright:** © 2020 Mavrot et al. This is an open access article distributed under the terms of the [Creative Commons Attribution License](https://creativecommons.org/licenses/by/4.0/), which permits unrestricted use, distribution, and reproduction in any medium, provided the original author and source are credited.
